# Supplementary material for: Race/Ethnicity, Enrichment/Fortification, and Dietary Supplementation in the U.S. Population, NHANES 2009–2012
Source: PubMed Central journal article supplement (PMC6567168; doi:10.3390/nu11051005), 2019-05-02
Supplement: nutrients-11-01005-s001.pdf [file nutrients-11-01005-s001.pdf]

**Table S1.** Descriptive Statistics of Sample Size for Interview Day 1 and Day 2 for the U.S. Population 2 Years of Age and Older, NHANES 2009-2012

|              | Non-Hispanic<br>White | Non-Hispanic<br>Black | Hispanic    | Other<br>Race/Ethnicity* | TOTAL         |
|--------------|-----------------------|-----------------------|-------------|--------------------------|---------------|
| <b>Day 1</b> |                       |                       |             |                          |               |
| PIR < 131%   | 1944                  | 1571                  | 2159        | 507                      | 6181          |
| PIR 131-185% | 660                   | 567                   | 667         | 222                      | 2116          |
| PIR > 185%   | 3502                  | 1410                  | 1434        | 926                      | 7272          |
| Missing PIR  | 313                   | 341                   | 570         | 182                      | 1406          |
| <b>TOTAL</b> | <b>6419</b>           | <b>3889</b>           | <b>4830</b> | <b>1837</b>              | <b>16,975</b> |
| <b>Day 2</b> |                       |                       |             |                          |               |
| PIR < 131%   | 1698                  | 1341                  | 1867        | 417                      | 5323          |
| PIR 131-185% | 577                   | 480                   | 565         | 190                      | 1812          |
| PIR > 185%   | 3251                  | 1257                  | 1267        | 844                      | 6599          |
| Missing PIR  | 278                   | 287                   | 455         | 148                      | 1168          |
| <b>TOTAL</b> | <b>5784</b>           | <b>3365</b>           | <b>4154</b> | <b>1599</b>              | <b>14,902</b> |

U.S., United States; NHANES, National Health and Nutrition Examination Survey; PIR, Poverty Index Ratio.

\* Other race includes non-Hispanic persons reporting multiple races.
